# Supplementary material for: High-resolution sampling and analysis of ambient particulate matter in the Pearl River Delta region of southern China: source apportionment and health risk implications
Source: Copernicus journal article supplement (doi:10.5194/acp-18-2049-2018), 2018-02-13
Supplement: Supplementary file 1 [file acp-18-2049-2018-supplement.pdf]

Supplement of Atmos. Chem. Phys., 18, 2049–2064, 2018  
<https://doi.org/10.5194/acp-18-2049-2018-supplement>  
© Author(s) 2018. This work is distributed under  
the Creative Commons Attribution 4.0 License.

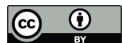

*Supplement of*

## **High-resolution sampling and analysis of ambient particulate matter in the Pearl River Delta region of southern China: source apportionment and health risk implications**

**Shengzhen Zhou et al.**

*Correspondence to:* Xuemei Wang (eeswxm@mail.sysu.edu.cn)

The copyright of individual parts of the supplement might differ from the CC BY 4.0 License.

## 1. Foshan PM<sub>2.5</sub> and PM<sub>2.5-10</sub> PMF receptor modelling diagnostics

PMF analyses involve many details about the development of the data, decisions of what data to include/exclude, determination of a solution, and evaluation of robustness of that solution. The following diagnostics for the PMF solutions are reported as recommended by Paatero and co-workers (Paatero et al., 2014; Brown et al., 2015).

### Summary of EPA PMF settings for receptor modelling of Foshan PM<sub>2.5</sub> and PM<sub>2.5-10</sub>

| Parameter                                           | Setting                                                                                                                                                            |
|-----------------------------------------------------|--------------------------------------------------------------------------------------------------------------------------------------------------------------------|
| Data type; averaging timeframe                      | PM <sub>2.5</sub> , PM <sub>10-2.5</sub> , Hourly                                                                                                                  |
| N samples                                           | 1127                                                                                                                                                               |
| N factors                                           | 6                                                                                                                                                                  |
| Treatment of missing data                           | No missing data                                                                                                                                                    |
| Treatment of data below detection limit (BDL)       | Data used as reported, no modification or censoring of BDL data                                                                                                    |
| Lower limit for normalized factor contributions gik | -0.2                                                                                                                                                               |
| Robust mode                                         | Yes                                                                                                                                                                |
| Constraints                                         | None                                                                                                                                                               |
| Seed value                                          | Random                                                                                                                                                             |
| N bootstraps in BS                                  | 400                                                                                                                                                                |
| r <sup>2</sup> for BS                               | 0.6                                                                                                                                                                |
| DISP dQmax                                          | 4, 8, 16, 32                                                                                                                                                       |
| DISP active species                                 | SO <sub>2</sub> , NO <sub>2</sub> , CO, PM <sub>10</sub> , PM <sub>2.5</sub> , BC, S, Cl, K, Ca, V, Cr, Fe, Ni, Zn, As, Pb, Al-C, Si-C, S-C, Cl-C, K-C, Ca-C, Fe-C |
| N bootstraps; r <sup>2</sup> for BS in BS-DISP      | 400; 0.6                                                                                                                                                           |
| BS-DISP active species                              | BC, S, Cl, K, Ca, V, Cr, Fe, Ni, Zn, As, Pb, Al-C, Si-C, S-C, Cl-C, K-C, Ca-C, Fe-C                                                                                |
| BS-DISP dQmax                                       | 0.5, 1, 2, 4                                                                                                                                                       |
| Extra modelling uncertainty                         | 15%                                                                                                                                                                |

## Output diagnostics for receptor modelling of Foshan PM<sub>2.5</sub> and PM<sub>2.5-10</sub>

| Diagnostic                                 | 6 factors     |
|--------------------------------------------|---------------|
| Q <sub>Theoretical</sub>                   | 23625         |
| Q <sub>Expected</sub>                      | 21225         |
| Q <sub>true</sub>                          | 15594         |
| Q <sub>robust</sub>                        | 15589         |
| Q <sub>robust</sub> /Q <sub>expected</sub> | 0.735         |
| DISP Diagnostics:                          |               |
| Error code                                 | 0             |
| Largest decrease in Q                      | 0             |
| DISP % dQ                                  | 0             |
| DISP swaps by factor                       | 0             |
| BS-DISP Diagnostics:                       |               |
| BS mapping (Fpeak BS – Unmapped)           | 92% (99% – 0) |
| BS-DISP % cases accepted                   | 89%           |
| Largest Decrease in Q:                     | -39.98        |
| BS-DISP % dQ(Robust)                       | -0.26         |
| [BS-FPEAK (Strength = -3, %DQ(Robust))]    | [2.91]        |
| # of Decreases in Q:                       | 43            |
| # of Swaps in Best Fit:                    | 0             |
| # of Swaps in DISP:                        | 2             |
| BS-DISP swaps by factor                    | 0             |

### References:

Brown, S. G., Eberly, S., Paatero, P., and Norris, G. A.: Methods for estimating uncertainty in PMF solutions: Examples with ambient air and water quality data and guidance on reporting PMF results, *Science of the Total Environment*, 518-519, 626-635, 10.1016/j.scitotenv.2015.01.022, 2015.

Paatero, P., Eberly, S., Brown, S. G., and Norris, G. A.: Methods for estimating uncertainty in factor analytic solutions, *Atmos. Meas. Tech.*, 7, 781-797, 10.5194/amt-7-781-2014, 2014.

## 2. Figures

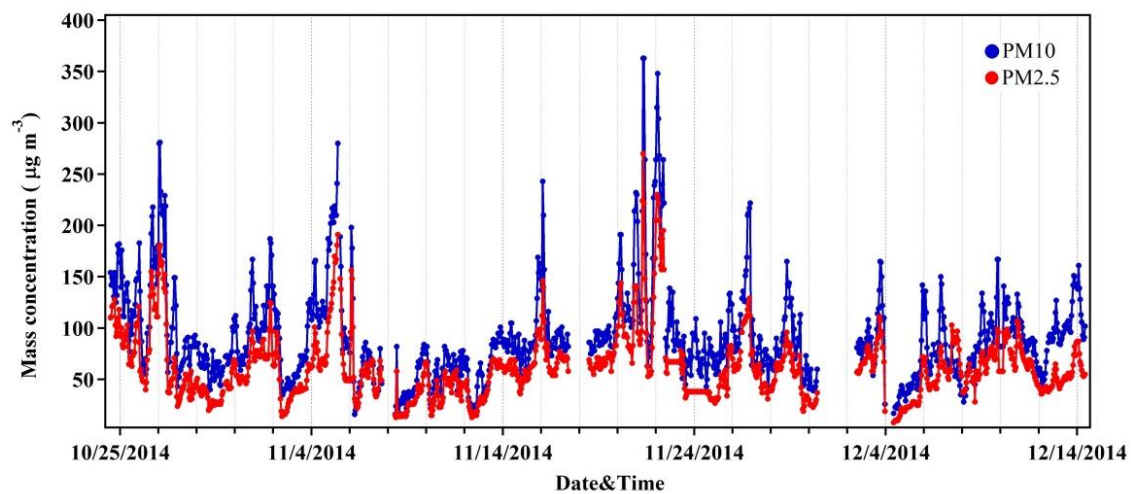

**Figure S1.** The hourly variations of  $\text{PM}_{2.5}$  and  $\text{PM}_{10}$  mass concentrations during the observation.

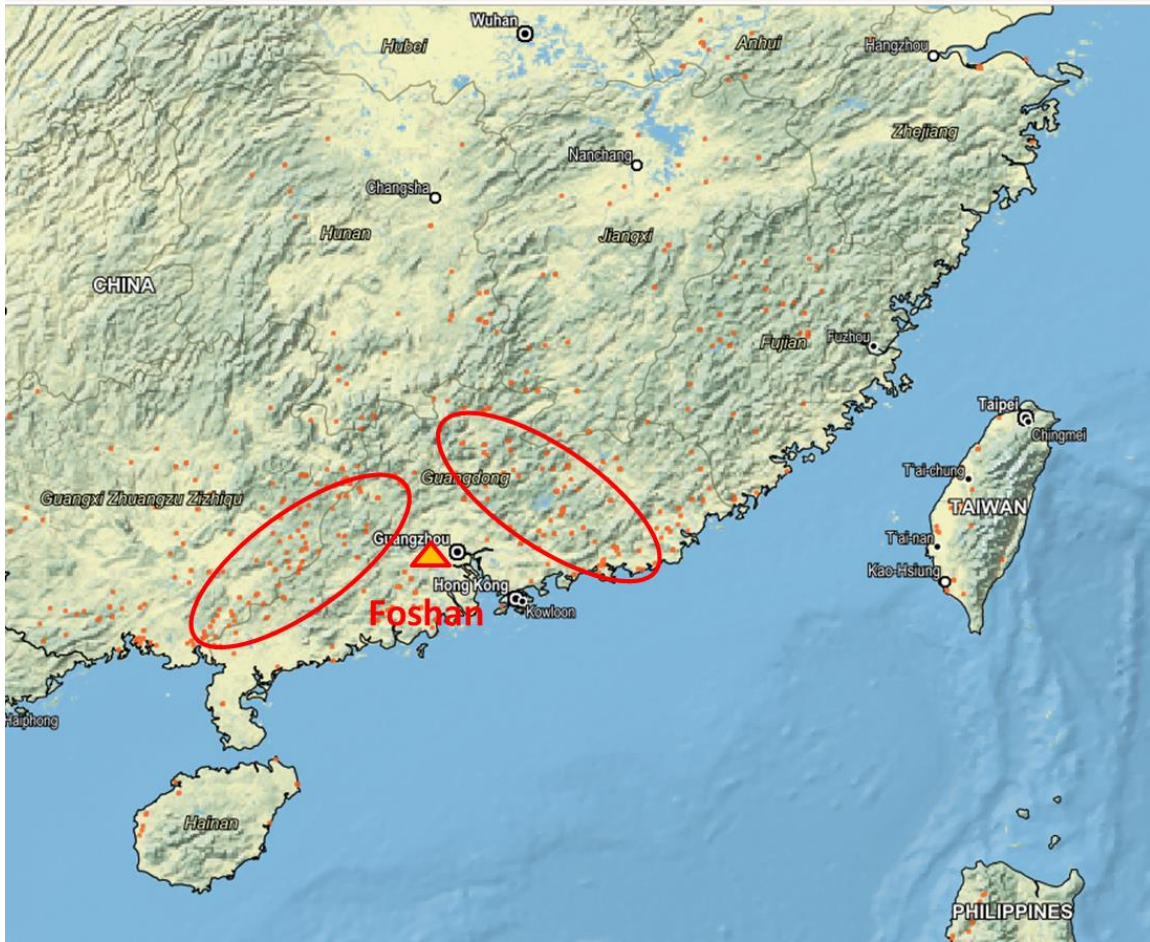

**Figure S2.** Geographical distribution of fires from November 1 to 31, 2014 over southern China (<https://firms.modaps.eosdis.nasa.gov/firemap/>).

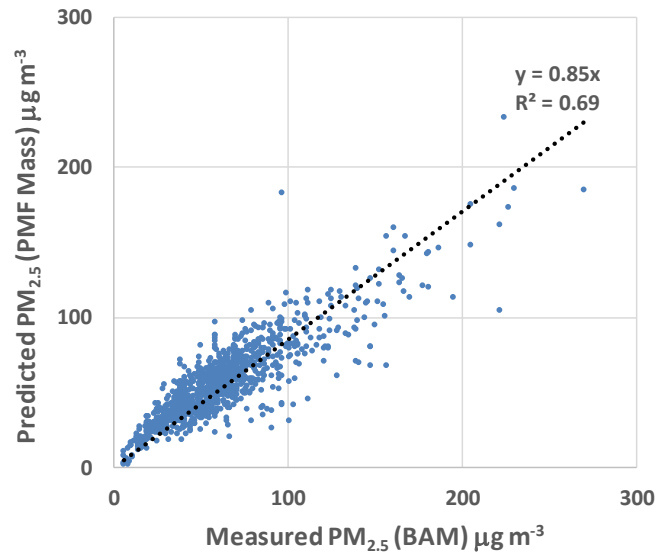

(a)

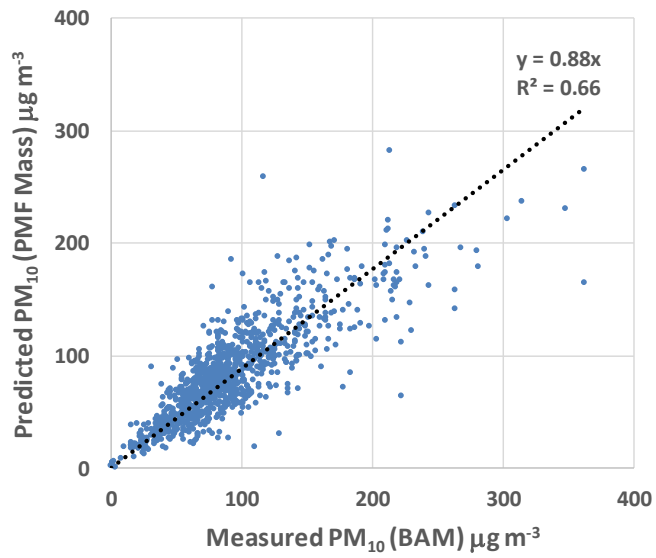

(b)

**Figure S3.** (a) Plot of Foshan  $PM_{2.5}$  predicted (PMF mass) against observed  $PM_{2.5}$  mass; (b) Plot of Foshan  $PM_{10}$  predicted (PMF mass) against observed  $PM_{10}$  mass.

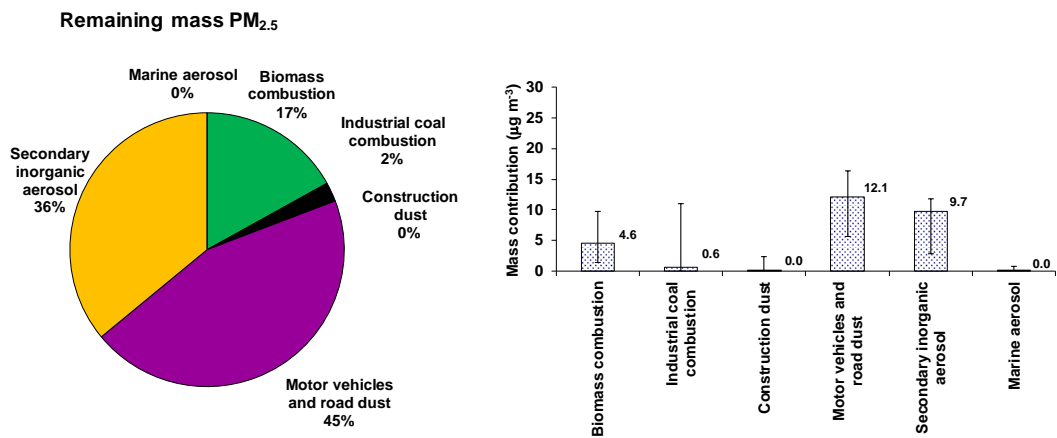

**Figure S4.** Source contributions to RMPM<sub>2.5</sub> at Foshan showing the average concentrations of RMPM<sub>2.5</sub> (in µg m<sup>-3</sup>) during the monitoring period

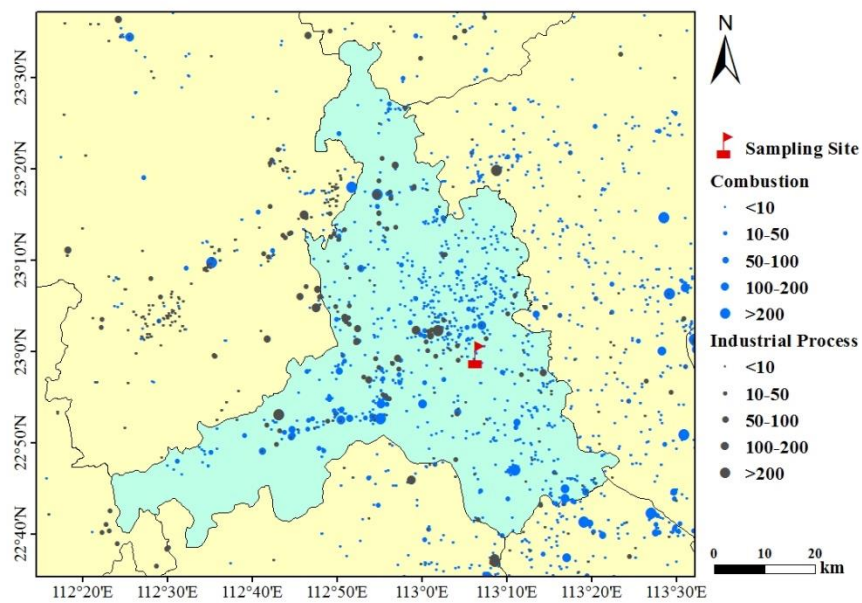

**Figure S5.** Location of PM<sub>2.5</sub> industrial process and combustion sources in Foshan at the year of 2012 (emissions inventory data in tonnes yr<sup>-1</sup> from Yin et al.(2017)).
